# Supplementary material
Source: Research Square preprint supplement (doi:10.21203/rs.3.rs-9308492/v1)
Supplement: Supplementary file 1 [file 158231e4cc951b73df735717.docx]

# Supplementary Materials

## S0. Model Identifiers

The following model identifiers were used in all pipeline runs reported in the manuscript:

- **Screening:** Anthropic Claude Haiku 4.5 — model ID claude-haiku-4-5-20251001
- **Extraction and risk of bias:** Anthropic Claude Sonnet 4 — model ID claude-sonnet-4-20250514

All API calls used the Anthropic Messages API. Temperature was set to 0.3 for screening and 0.0 for extraction.

## S1. Prompt Templates

### S1.1 Screening Prompt

The full screening prompt template is available at prompts/screening_prompt.md in the repository. Key design decisions:

- **Structured JSON output** with criterion-level assessments enables audit of which specific criteria drove each decision
- **“When in doubt, include” instruction** with explicit confidence threshold (>0.95 required for exclusion) prioritises sensitivity over specificity
- **Population definition** explicitly includes ARDS, VAP, and infection-related critical illness to capture studies included in major meta-analyses where sepsis populations overlap with these conditions
- **Primary RCT requirement** explicitly excludes secondary analyses, post-hoc analyses, and subgroup re-analyses of previously published trials — the main source of false positives in initial prompt iterations

### S1.2 Extraction Prompt

The full extraction prompt is at prompts/pico_extraction_prompt.md. Critical rules embedded in the prompt:

1. Mortality fields must be **integer event counts**, never percentages. If the text reports percentages, the LLM must compute the count (e.g., 22% of 259 = 57).
2. Arm-level sample sizes (intervention N and control N) are required alongside event counts.
3. Mortality timepoint hierarchy: hospital > 28-day > ICU > 60-day > 90-day.
4. Article metadata (author, year, journal) is pre-filled from PubMed to prevent null identification fields.

### S1.3 Self-Verification Prompt

The verification pass explicitly checks for: - Percentage-to-count conversion errors (the most common failure mode) - Swapped intervention/control values - Missing denominators - Whether the source text describes a primary RCT or a meta-analysis/secondary analysis

### S1.4 Risk of Bias Prompt

The RoB assessment prompt follows the Cochrane RoB 2 framework with 5 domains, requiring supporting quotes from the text for each judgment.

## S2. Prompt Engineering Iterations

The screening prompt underwent two major revisions based on validation results:

**Version 1 (baseline):** Standard PICO criteria with sepsis-only population definition. - Result: Sensitivity 0.625, Specificity 0.865, Cohen’s kappa 0.196 - Failures: Missed ARDS/VAP studies (McAuley 2014, Papazian 2013); missed statin continuation trial (Kruger 2011); 15/28 false positives caused by JSON parse errors

**Version 2 (revised):** Broadened population to include ARDS/VAP/critical illness; clarified statin continuation as eligible; excluded secondary analyses; added “respond with ONLY JSON” instruction; fixed parser to handle trailing text. - Result: Sensitivity 1.000, Specificity 0.981, Cohen’s kappa 0.791 - Improvement: All 3 false negatives recovered; false positives reduced from 28 to 4; JSON parse errors eliminated

The extraction prompt underwent three iterations: - V1: Percentages stored as event counts; missing metadata; wrong full texts used - V2: Fixed pydantic validation; added metadata fallbacks; still percentage issues - V3: Added explicit percentage-to-count conversion rules; added full-text sanity check; added timepoint hierarchy. Final accuracy: 4/7 exact match.

## S3. Full-Text Retrieval and Sanity Checking

PMC full-text retrieval encountered two cases where the PMC ID in PubMed metadata pointed to an unrelated article: - PMID 24835849 (Truwit 2014, SAILS trial) → PMC3524177 returned a general review article - PMID 29142375 (Singh 2017) → PMC4241052 returned an unrelated article

A title/author sanity check was implemented: after fetching the PMC XML, the system verifies that at least one author surname appears in the first 5000 characters and that >30% of distinctive title words are present. Both mismatched articles were correctly rejected, and extraction fell back to abstract-only.

This is a practical consideration for any automated extraction system relying on PMC. Cross-referencing PMC IDs should be treated as unreliable for a subset of articles.

## S4. Individual Study Extraction Data

Full extracted data for all 8 studies is available in data/extracted/extractions.json. The extraction log with initial, verified, and risk-of-bias JSON for each study is at data/extracted/extraction_log.jsonl.

## S5. Screening Decision Log

The complete screening log (215 articles × 3 runs = 645 decisions) is available at data/screened/screening_log.jsonl. Each entry contains: PMID, title, run ID, decision, confidence score, per-criterion assessments, reasoning, model name, token usage, and cost.

## S6. Living Update Deployment

Full deployment instructions for the GitHub Actions scheduled workflow are provided in DEPLOYMENT.md at the repository root. The workflow file is at .github/workflows/living_update.yml.

## S7. Error Analysis — False Positives

The 4 false positive studies from screening (classified as INCLUDE but not in the 2018 reference):

| PMID | Study | Year | Classification | Rationale |
| --- | --- | --- | --- | --- |
| 41104567 | Rashid et al. | 2025 | True new RCT | Open-label RCT of atorvastatin in sepsis, n=68. Published after reference. |
| 31206313 | Sapey et al. | 2019 | Pilot RCT | Simvastatin in CAP+sepsis, double-blind. Published after reference. |
| 28511660 | Agus et al. | 2017 | Follow-up report | HARP-2 trial 12-month outcomes and cost-effectiveness. |
| 25855898 | Ghosh et al. | 2015 | Mixed/mechanistic | Drug repurposing study with small embedded RCT component. |

Of these, 2 are legitimate new evidence, 1 is supplementary data for an existing trial, and 1 is a borderline mechanistic study. The pipeline’s “false positives” are arguably appropriate inclusions for a living review that aims to capture emerging evidence.
