# Supplementary material
Source: Research Square preprint supplement (doi:10.21203/rs.3.rs-9308492/v1)
Supplement: Supplementary file 2 [file fe8613db5a864b262b7e9a5b.docx]

# PRISMA 2020 Checklist

Applicable items completed for the automated review component of this methods validation study. Items marked N/A are not applicable because the primary study objective is pipeline validation, not a de novo systematic review.

| Section | Item # | Checklist item | Reported on page/section |
| --- | --- | --- | --- |
| **Title** | 1 | Identify the report as a systematic review | Title |
| **Abstract** | 2 | Structured summary | Abstract |
| **Introduction** |  |  |  |
| Rationale | 3 | Rationale for the review | Introduction, para 1–2 |
| Objectives | 4 | Research question (PICO) | Introduction, para 4; Methods, Study design |
| **Methods** |  |  |  |
| Eligibility criteria | 5 | Inclusion and exclusion criteria | Methods, Stage 2 |
| Information sources | 6 | Databases and date of search | Methods, Stage 1 |
| Search strategy | 7 | Full search strategy | Methods, Stage 1; Supplementary (config file) |
| Selection process | 8 | Screening process | Methods, Stage 2 |
| Data collection | 9 | Data extraction process | Methods, Stage 3 |
| Data items | 10a | Outcomes sought | Methods, Stage 2 (criterion e) |
| Study risk of bias | 11 | Methods for RoB assessment | Methods, Stage 3 (RoB 2) |
| Effect measures | 12 | Effect measures used | Methods, Stage 4 (RR) |
| Synthesis methods | 13a–f | Meta-analysis methods | Methods, Stage 4 |
| Reporting bias | 14 | Methods for assessing publication bias | Methods, Stage 4 (Egger’s test) |
| Certainty assessment | 15 | GRADE or equivalent | N/A — not performed |
| **Results** |  |  |  |
| Study selection | 16a–b | Flow diagram, excluded studies | Figure 2, Results (Screening) |
| Study characteristics | 17 | Characteristics of included studies | Table 2 |
| Risk of bias in studies | 18 | RoB results | Table 2 (RoB column) |
| Individual results | 19 | Study-level data | Figure 3, Table 2 |
| Synthesis results | 20a–d | Pooled estimates, heterogeneity | Results (Meta-analytic synthesis), Table 3, Figure 3 |
| Reporting biases | 21 | Publication bias results | Results (Egger’s p = 0.46), Figure 4 |
| Certainty of evidence | 22 | GRADE assessment | N/A — not performed |
| **Discussion** |  |  |  |
| Discussion | 23a–d | Interpretation, limitations | Discussion |
| **Other** |  |  |  |
| Registration | 24a | Registration details | Declarations (not registered; rationale provided) |
| Protocol | 24b | Protocol access | Supplementary (protocol.json) |
| Support | 24c | Funding | Declarations |
| Competing interests | 24d | COI | Declarations |
| Data availability | 24e | Data/code access | Declarations |

## Items Not Applicable

- **Item 15 (GRADE certainty assessment):** Not performed. The primary objective is pipeline validation, not clinical guideline development. GRADE assessment could be added as a future pipeline module.
- **Item 22 (Certainty of evidence results):** As above.
- **Item 24a (Registration):** Not prospectively registered on PROSPERO. Rationale: the primary study is a methods validation, not a de novo review. Acknowledged in Declarations.
